CORRECTION

# Correction: Unstructured satellite survey detects up to 20% of archaeological sites in coastal valleys of southern Peru

Thomas J. Snyder, Randall Haas

The two authors, Thomas J. Snyder and Randall Haas, should be noted as shared first co-corresponding authors on this work.

## Reference

1. Snyder TJ, Haas R. Unstructured satellite survey detects up to 20% of archaeological sites in coastal valleys of southern Peru. PLoS One. 2024;19(2):e0292272. <https://doi.org/10.1371/journal.pone.0292272> PMID: [38319939](https://pubmed.ncbi.nlm.nih.gov/38319939/)

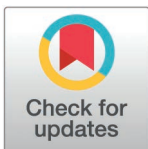

## OPEN ACCESS

**Citation:** Snyder TJ, Haas R (2025) Correction: Unstructured satellite survey detects up to 20% of archaeological sites in coastal valleys of southern Peru. PLoS One 20(7): e0328409. <https://doi.org/10.1371/journal.pone.0328409>

**Published:** July 15, 2025

**Copyright:** © 2025 Snyder, Haas. This is an open access article distributed under the terms of the [Creative Commons Attribution License](https://creativecommons.org/licenses/by/4.0/), which permits unrestricted use, distribution, and reproduction in any medium, provided the original author and source are credited.
